# Supplementary material
Source: publisher figshare collection journal article supplement (https://acs.figshare.com/ndownloader/files/20072627)
Supplement: Supplementary file 1 [file 20072627]

Supporting Information

**Fluorinated ether based electrolyte enabling sodium-metal batteries  
with exceptional cycling stability**

Qiang Yi,<sup>1,2</sup> Yao Lu<sup>1</sup>, Xiaorui Sun<sup>2,3</sup>, Hua Zhang<sup>3</sup>, Hailong Yu<sup>3</sup> and Chunwen Sun<sup>1,2\*</sup>

<sup>1</sup>CAS Center for Excellence in Nanoscience, Beijing Institute of Nanoenergy and Nanosystems,  
Chinese Academy of Sciences, Beijing 100083, P. R. China

<sup>2</sup>School of Nanoscience and Technology, University of Chinese Academy of Sciences, Beijing  
100049, P. R. China

<sup>3</sup>Beijing National Laboratory for Condensed Matter Physics, Institute of Physics,  
Chinese Academy of Sciences, Beijing 100190, P. R. China

\* Corresponding authors.

Tel.: +86-10-82854648, fax: +86-10-82854648. Email: [sunchunwen@binn.cas.cn](mailto:sunchunwen@binn.cas.cn) (C. Sun)

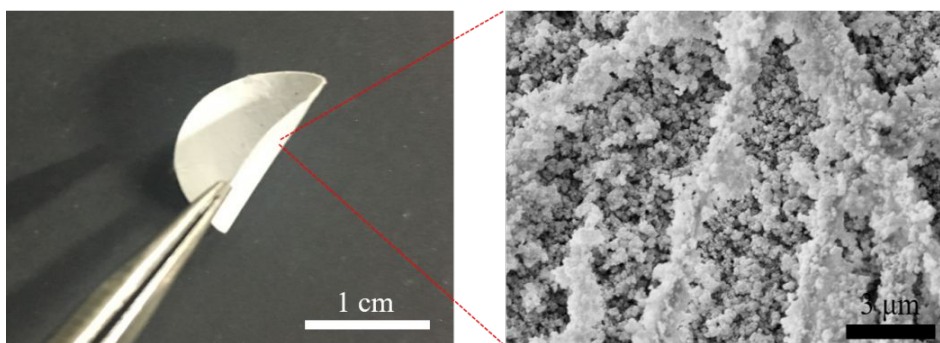

**Figure S1.** Photographs and SEM images of the nonflammable porous separator (NPS).

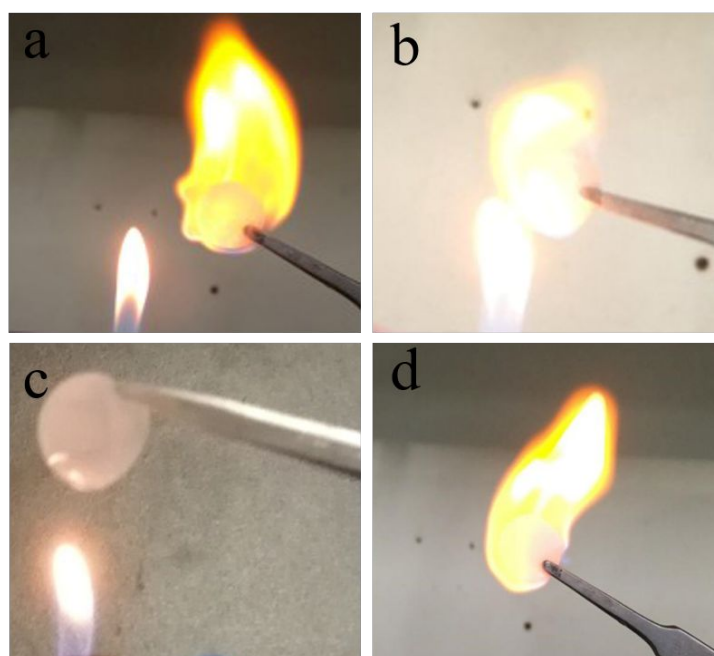

**Figure S2.** Flame test of different electrolytes absorbed in porous separators: (a)  $\text{NaPF}_6\text{-DME}$ , (b)  $\text{NaPF}_6\text{-FE}$  and (c)  $\text{NaPF}_6\text{-FRE}$ , (d)  $\text{EC/PC}$  based liquid electrolyte.

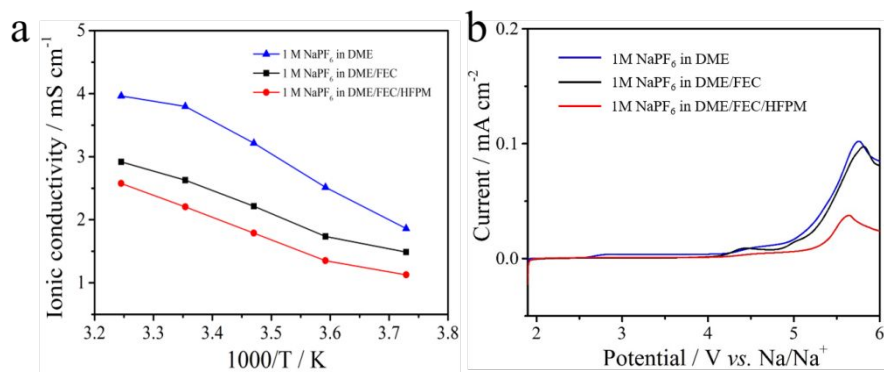

**Figure S3.** (a) Ionic conductivities of different electrolytes at different temperatures. (b) The electrochemical window of different electrolytes evaluated by a linear sweep voltammetry (LSV) from 1.9 V to 6.0 V.

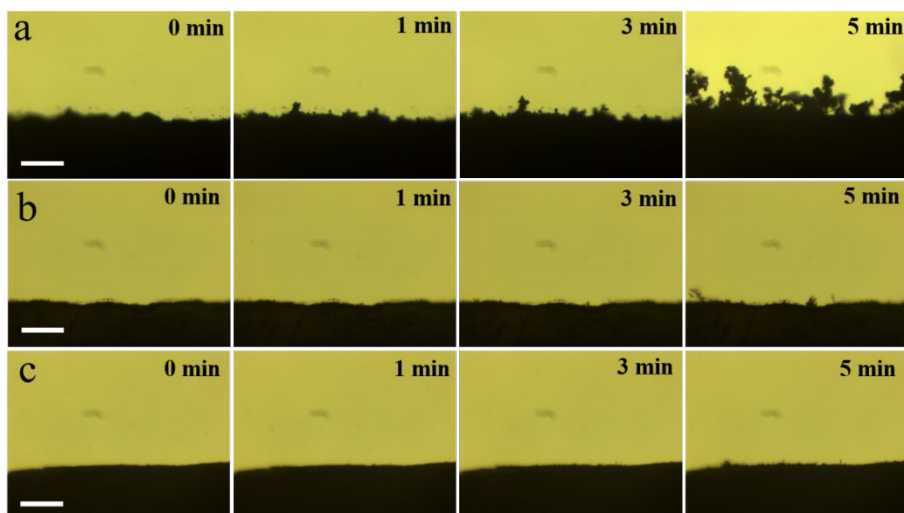

**Figure S4.** In situ optical observations of Na plating in different electrolytes: (a) NaPF<sub>6</sub>-DME, (b) NaPF<sub>6</sub>-FE and (c) NaPF<sub>6</sub>-FRE. All the scale bars are 500  $\mu\text{m}$ . The plating current is 2 mA cm<sup>-2</sup>.

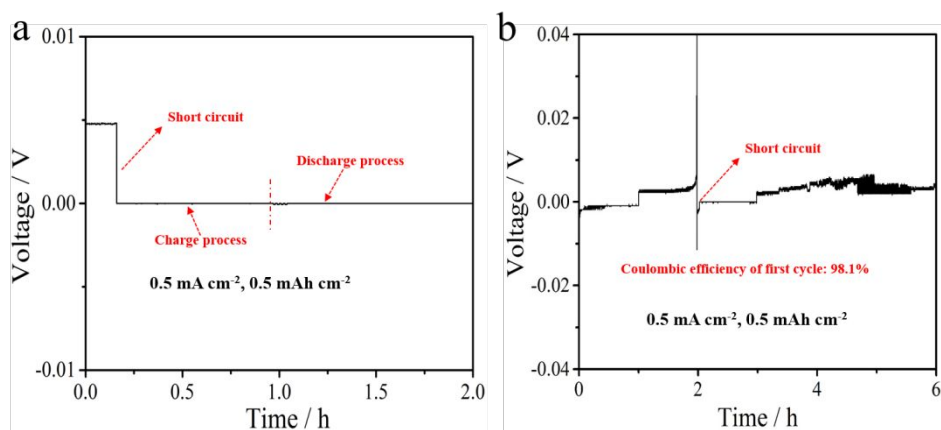

**Figure S5.** (a) Cycling performance of the Na symmetric cell with NaPF<sub>6</sub>-DME electrolyte at 0.5 mA cm<sup>-2</sup> and 0.5 mAh cm<sup>-2</sup>. (b) Cycling performance of the Na || Cu cell with NaPF<sub>6</sub>-DME electrolyte at 0.5 mA cm<sup>-2</sup> and 0.5 mAh cm<sup>-2</sup>.

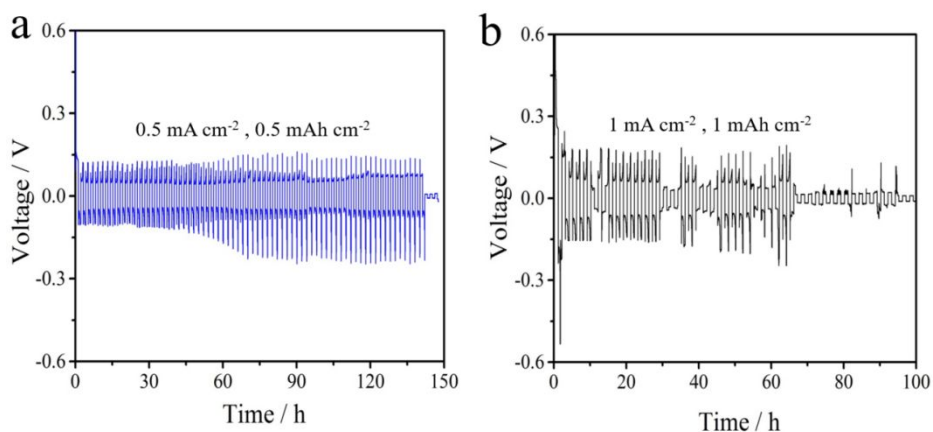

**Figure S6.** Cycling performance of Na symmetric cells with commercial carbonate-based electrolyte: (a) at 0.5 mA cm<sup>-2</sup> and 0.5 mAh cm<sup>-2</sup>, and (b) at 1 mA cm<sup>-2</sup> and 1 mAh cm<sup>-2</sup>.

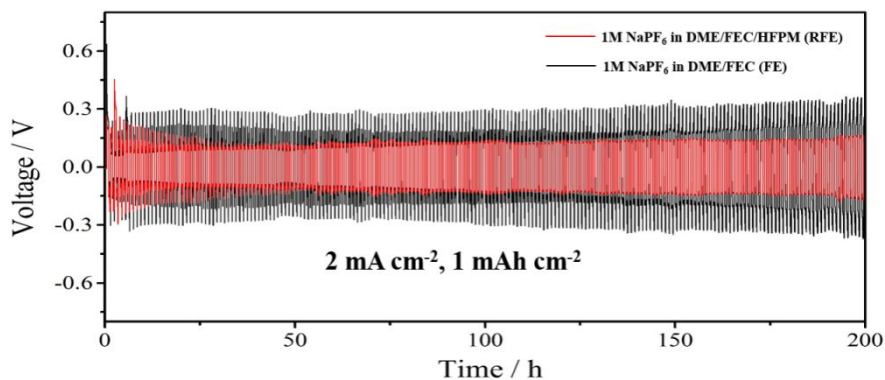

**Figure S7.** Cycling performance of the Na symmetric cell with NaPF<sub>6</sub>-FRE electrolyte absorbed in NPS at 2 mA cm<sup>-2</sup> and 1 mAh cm<sup>-2</sup>.

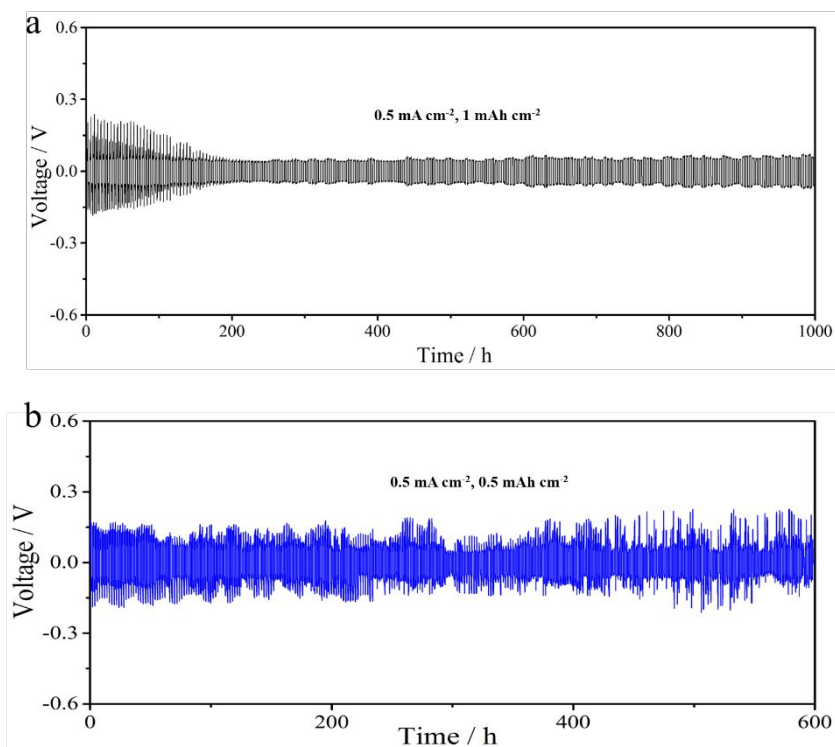

**Figure S8.** Cycling performance of the Na symmetric cell with (a) NaPF<sub>6</sub>-FRE electrolyte absorbed in glass fiber separator at 0.5 mA cm<sup>-2</sup> and 1 mAh cm<sup>-2</sup> and (b) NaPF<sub>6</sub>-FE electrolyte absorbed in glass fiber separator at 0.5 mA cm<sup>-2</sup> and 0.5 mAh cm<sup>-2</sup>.

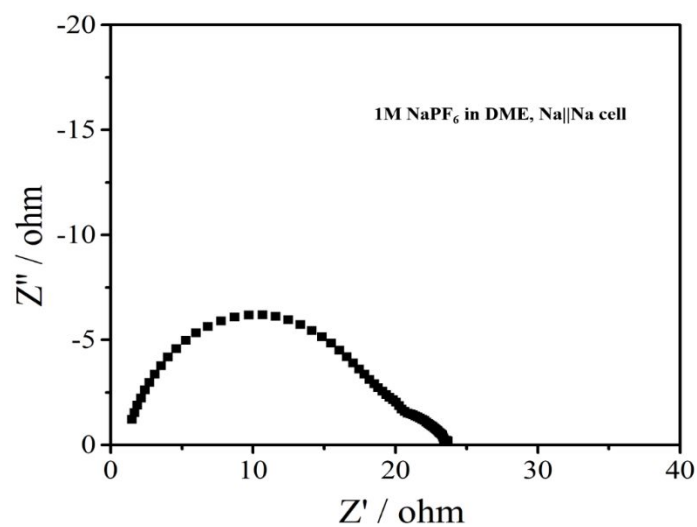

**Figure S9.** Nyquist plots of the Na symmetric cell with NaPF<sub>6</sub>-DME electrolyte before cycling test.

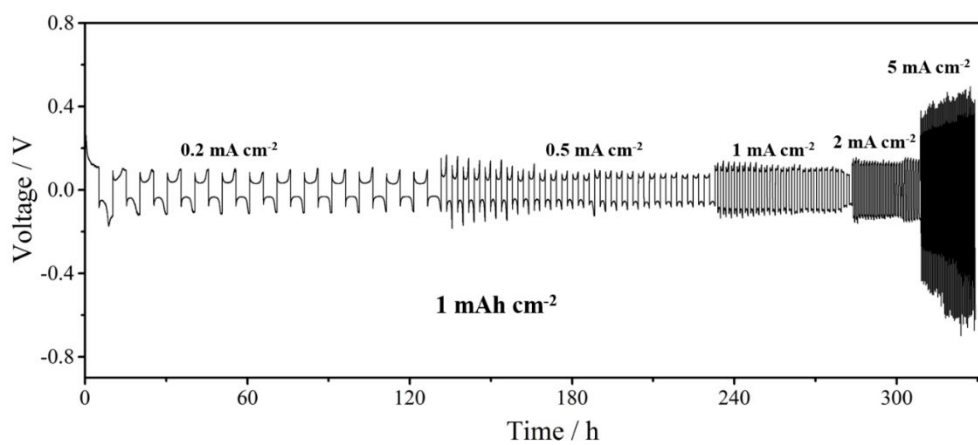

**Figure S10.** Rate performance of the Na symmetric cells with NaPF<sub>6</sub>-FRE electrolyte absorbed in NPS at different current densities.

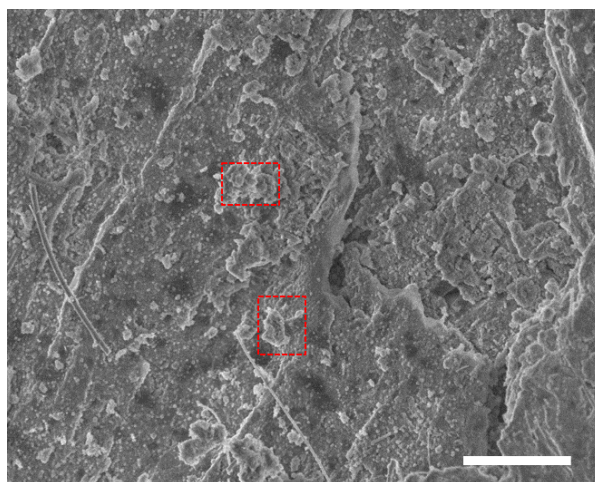

**Figure S11.** SEM images of the Na surface in the cell with Commercial NaPF<sub>6</sub>-EC/PC electrolyte after 2 cycles at 0.5 mA cm<sup>-2</sup> and 1mAh cm<sup>-2</sup>. The scale bars are 5 μm.

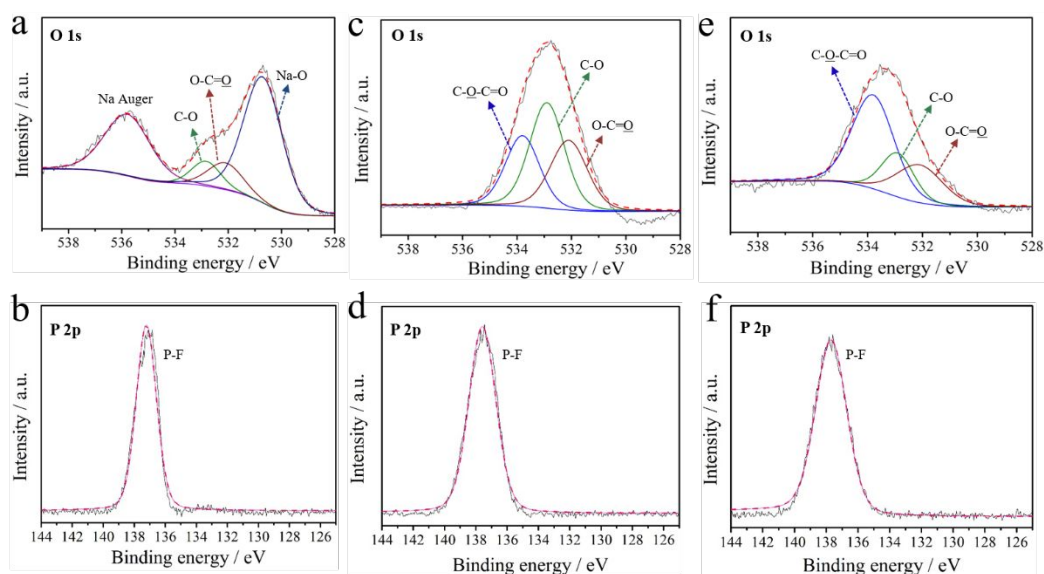

**Figure S12.** XPS spectra of Na surface after 50 cycles at 1 mA cm<sup>-2</sup> with different electrolytes: O1s and P2p spectra of Na surface after cycling with NaPF<sub>6</sub>-DME (a, b), NaPF<sub>6</sub>-FE (c, d) and NaPF<sub>6</sub>-FRE and (e, f) electrolyte.

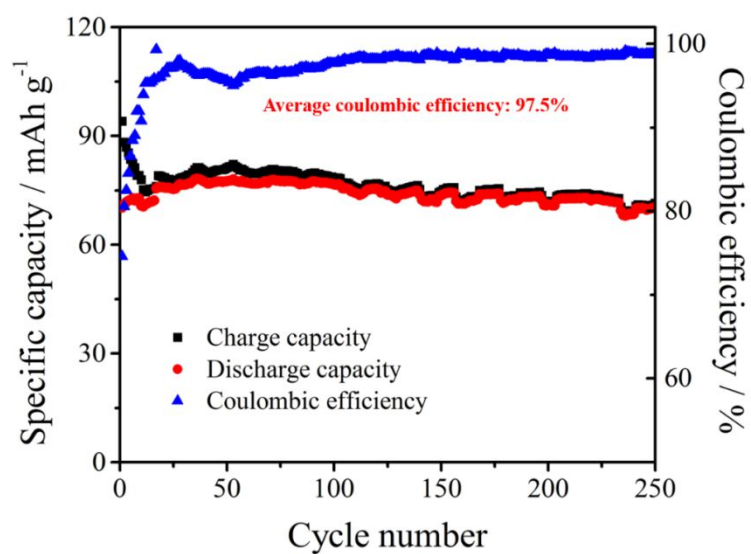

**Figure S13.** Cycling performance of the NVP||Na cells with 1M NaPF<sub>6</sub>-DME electrolyte absorbed in glass fiber at 0.5 C.

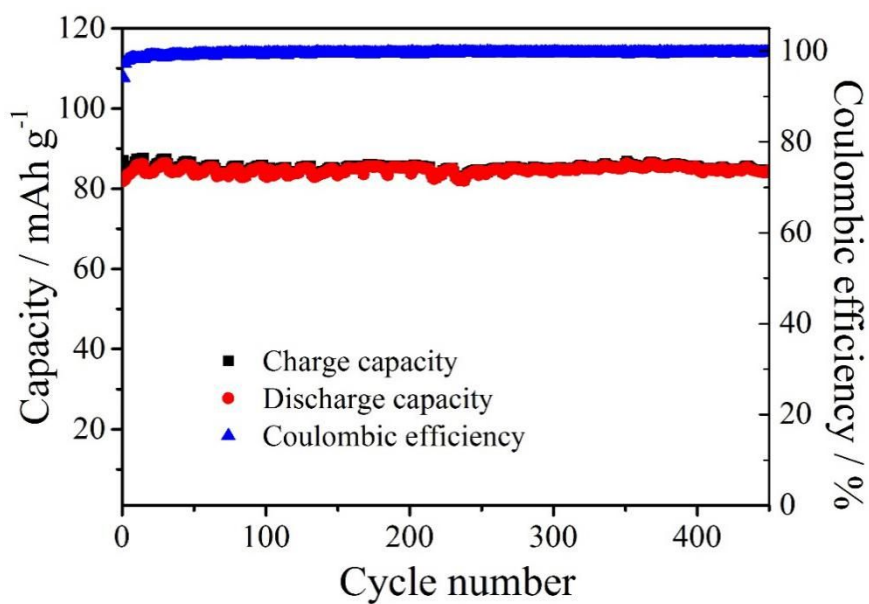

**Figure S14.** Cycling performance of the NVP||Na cells with 1M NaPF<sub>6</sub>-FE electrolyte absorbed in NPS at 0.5 C.



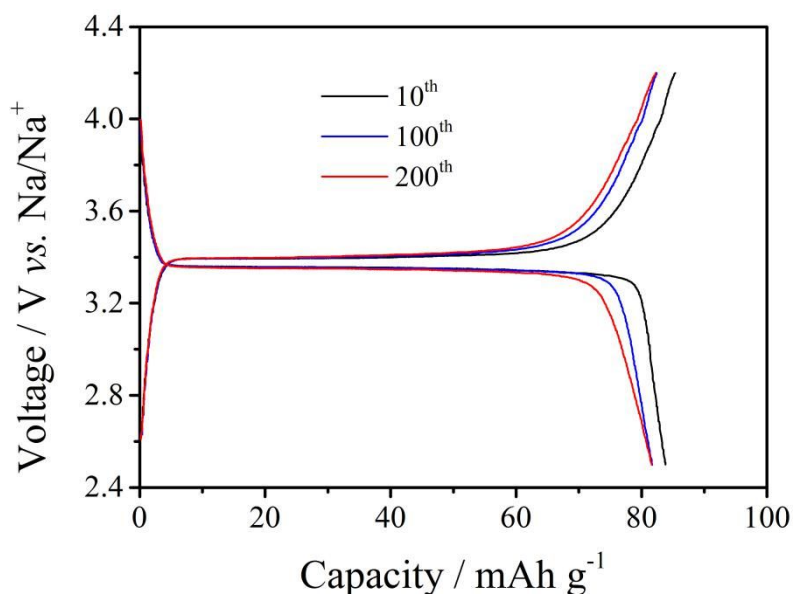

**Figure S15.** Typical charge/discharge curves of the NVP||Na cell with 1M NaPF<sub>6</sub>-DME electrolyte absorbed in NPS at 0.5 C after different cycles.

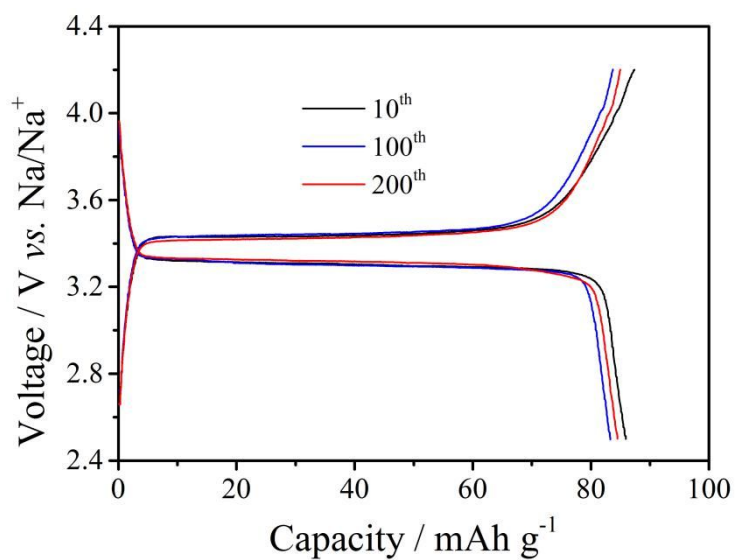

**Figure S16.** Typical charge/discharge curves of the NVP||Na cell with 1M NaPF<sub>6</sub>-FE electrolyte absorbed in NPS at 0.5 C after different cycles.

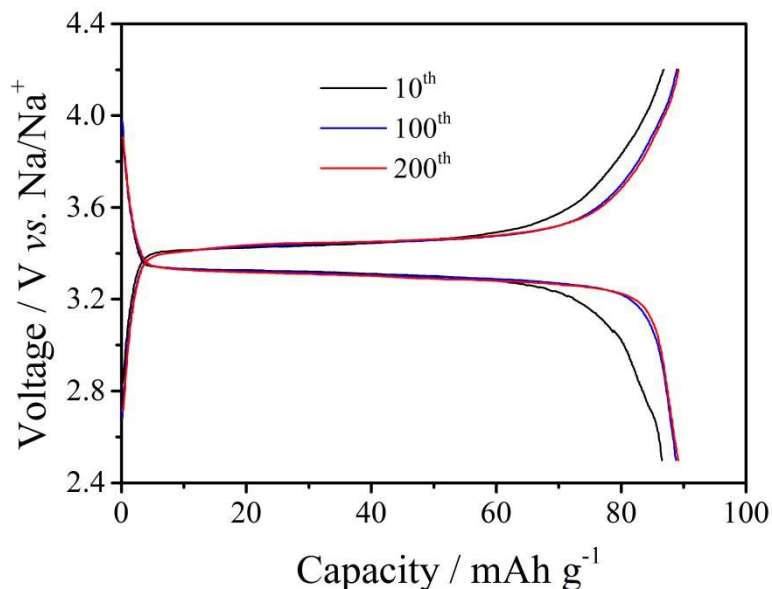

**Figure S17.** Typical charge/discharge curves of the NVP||Na cell with 1M NaPF<sub>6</sub>-FRE electrolyte absorbed in NPS at 0.5 C after different cycles.

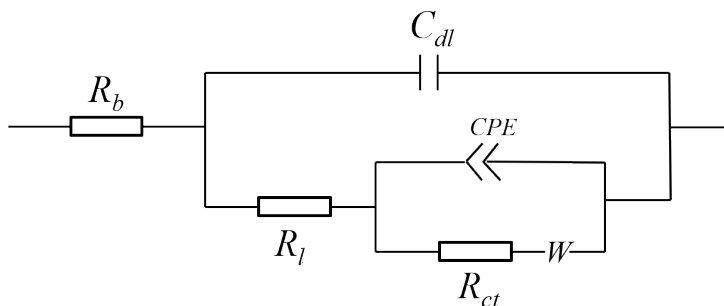

**Figure S18.** Equivalent circuit utilized for fitting electrochemical impedance spectroscopy.  $R_b$ ,  $R_l$ ,  $R_{ct}$  and  $Z_w$  corresponding to bulk resistance, liquid electrolyte resistance, charge transfer resistance and Warburg impedance.<sup>[S1-S2]</sup> Interfacial resistance ( $R_l$ ) corresponds to the intercept of the semi-circle with the real axis at the lower frequency.

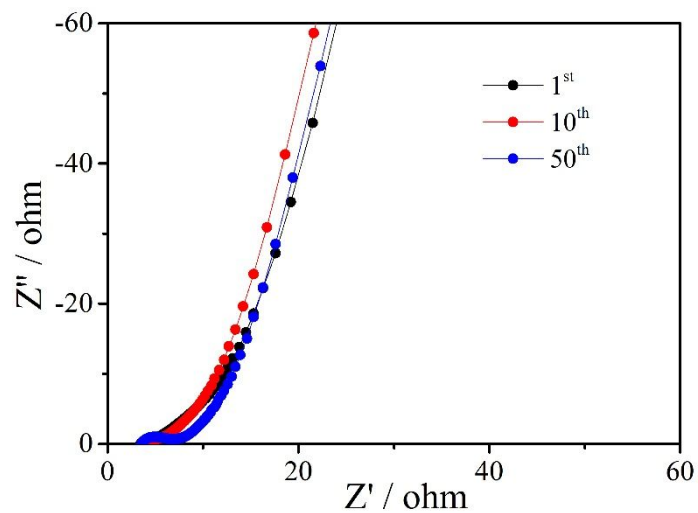

**Figure S19.** Nyquist plots of the NVP||Na cell with NaPF<sub>6</sub>-DME electrolyte after different cycles at 1 C.

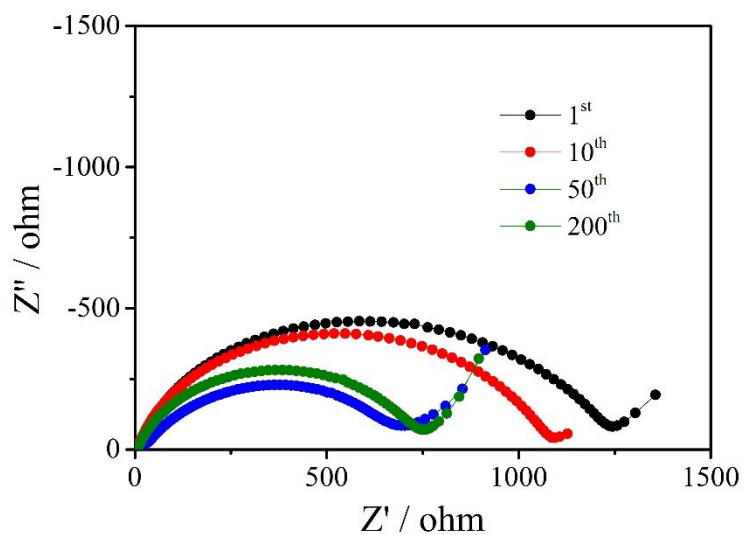

**Figure S20.** Nyquist plots of the NVP||Na cell with NaPF<sub>6</sub>-FE electrolyte after different cycles at 1 C.

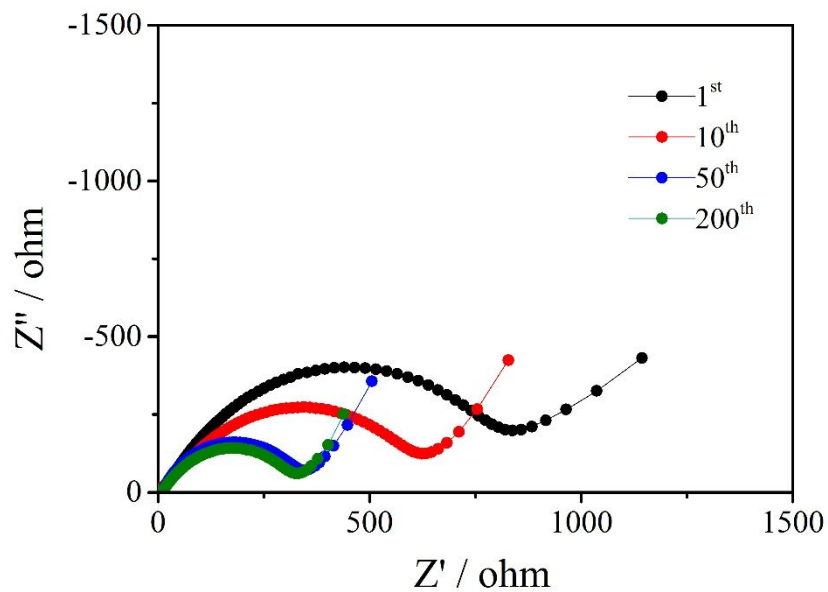

**Figure S21.** Nyquist plots of NVP||Na cell with NaPF<sub>6</sub>-FRE electrolyte after different cycles at 1 C.

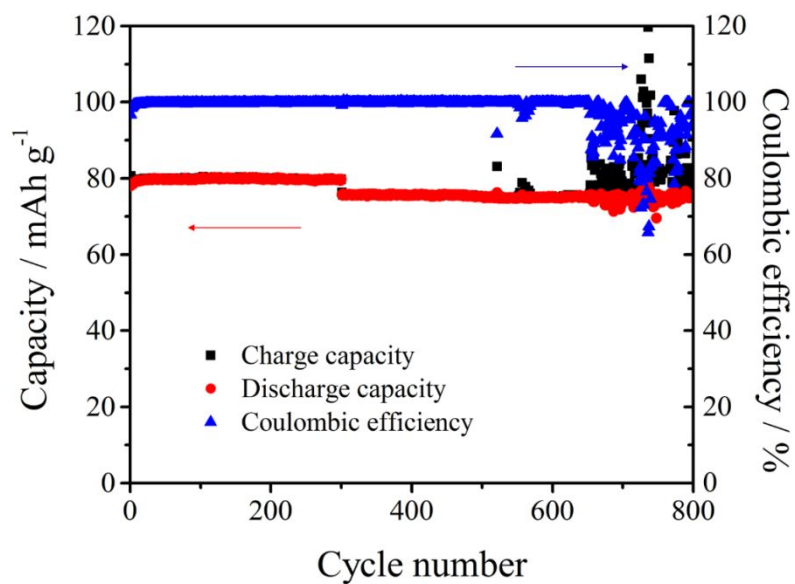

**Figure S22.** Cycling performance of the NVP||Na cells with commercial carbonate-based electrolyte absorbed in NPS at 0.5 C and 1C.

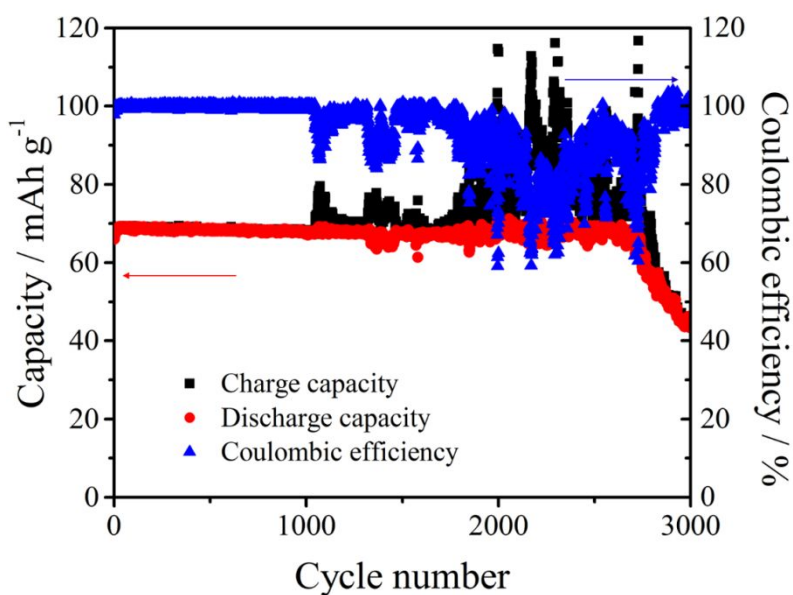

**Figure S23.** Cycling performance of the NVP||Na cells with commercial carbonate-based electrolyte absorbed in NPS at 5 C.

**Table S1.** Comparison of the cycling performance of NVP-based cathodes based cells with different electrolytes cycled at 5 C.

| Cathode     | Electrolyte                          | Capacity retention      | Reference |
|-------------|--------------------------------------|-------------------------|-----------|
| NVP@rGO     | 1M NaClO <sub>4</sub> in EC/DMC      | 81% after 3000 cycles   | S3        |
| NVP@C       | 1M NaClO <sub>4</sub> in PC          | 88% after 700 cycles    | S4        |
| NVP@C@CMK-3 | 1M NaClO <sub>4</sub> in PC/FEC      | 68% after 2000 cycles   | S5        |
| NVP@C@HC    | 1M NaClO <sub>4</sub> in EC/DMC/FEC  | 90.4% after 500 cycles  | S6        |
| NVP         | 1M NaPF <sub>4</sub> in DME/FEC/HFPM | 94.1% after 2000 cycles | This work |

## References

(S1) Ates, M.; Sarac, A. S. Capacitive Behavior of Polycarbazole and Poly (N-vinylcarbazole)-Coated Carbon Fiber Microelectrodes in Various Solutions. *J.*

*Appl. Electrochem.* **2009**, *39*, 2043–2048.

(S2) Sarac, A. S.; Ates, M.; Kilic, B. Electrochemical Impedance Spectroscopic Study of Polyaniline on Platinum, Glassy Carbon and 661 Carbon Fiber Microelectrodes.

*Int. J. Electrochem. Sci.* **2008**, *3*, 777– 662786.

(S3) Zhang, J.; Fang, Y.; Xiao, L.; Qian, J.; Cao, Y.; Ai, X.; Yang, H. Graphene-Scaffolded  $\text{Na}_3\text{V}_2(\text{PO}_4)_3$  Microsphere Cathode with High Rate Capability and Cycling Stability for Sodium Ion Batteries. *ACS Appl. Mater. Interfaces* **2017**, *9*, 7177–7184.

(S4) Shen, W.; Li, H.; Guo, Z.; Wang, C.; Li, Z.; Xu, Q.; Liu, H.; Wang, Y.; Xia, Y. Double-Nanocarbon Synergistically Modified  $\text{Na}_3\text{V}_2(\text{PO}_4)_3$ : an Advanced Cathode for High-Rate and Long-Life Sodium-Ion Batteries. *ACS Appl. Mater. Interfaces* **2016**, *8*, 15341-15351.

(S5) Jiang, Y.; Yang, Z.; Li, W.; Zeng, L.; Pan, z.; Wang, M.; Wei, X.; Hu, G.; Gu, L.; Yu, Y. Nanoconfined Carbon-Coated  $\text{Na}_3\text{V}_2(\text{PO}_4)_3$  Particles in Mesoporous Carbon Enabling Ultralong Cycle Life for Sodium-Ion Batteries. *Adv. Energy Mater.* **2015**, *5*, 1402104.

(S6) Chen, L.; Zhao, Y.; Liu, S.; Zhao, L. Hard Carbon Wrapped  $\text{Na}_3\text{V}_2(\text{PO}_4)_3$ @C Porous Composite Extending Cycling Lifespan for Sodium-Ion Batteries. *ACS Appl. Mater. Interfaces* **2017**, *9*, 44485-44493.
